# Supplementary material
Source: publisher figshare collection journal article supplement (https://tandf.figshare.com/articles/dataset/_/27109177)
Supplement: Supplementary file 1 [file 1]

Figure 1s density of allyl alcohol

Figure 2s viscosity of allyl alcohol

Figure 3s Density of ethanoic acid

Figure4s Speed of sound of ethanoic acid

Figure5s viscosity of ethanoic acid

Figure6s density of propanoic acid

Figure7s speed of sound of propanoic acid

Figure8s viscosity of propanoic acid

Figure 9s density of butanoic acid

Figure 10s Speed of sound of butanoic acid

Figure 11s viscosity of butanoic acid

Fig 12S: density with mole fraction (*x1*) of allyl alcohol in the binary liquid mixtures of allyl alcohol with butanoic acid (filled square); propanoic acid (filled circle) and ehanoic acid (filled triangle) at 303.15 K and (---) calculated with Jouyban -Acree model theory using Parameters at 303.15 K

Fig 13S: speed of sound with mole fraction (*x1*) of allyl alcohol in the binary liquid mixtures of allyl alcohol with butanoic acid (filled square); propanoic acid (filled circle) and ehanoic acid (filled triangle) at 303.15 K and (---) calculated with Jouyban -Acree model theory using Parameters at 303.15 K

Fig 14S: viscosity with mole fraction (*x1*) of allyl alcohol in the binary liquid mixtures of allyl alcohol with butanoic acid (filled square); propanoic acid (filled circle) and ehanoic acid (filled triangle) at 303.15 K and (---) calculated with Jouyban -Acree model theory using Parameters at 303.15 K
